# Supplementary material
Source: PubMed Central journal article supplement (PMC7936053)
Supplement: djaa099_supplementary_data.pdf [file djaa099_supplementary_data.pdf]

Supplementary Table 1. Number of controls and number of cases overall and by histotype\*.

|                        | <b>Number of Controls</b><br>(n=16942) | <b>Number of Cases</b><br>(n=10470) | <b>High-Grade Serous</b><br>(n=5029) | <b>Low-Grade Serous</b><br>(n=438) | <b>Mucinous</b><br>(n=714) | <b>Endometrioid</b><br>(n=1630) | <b>Clear Cell</b><br>(n=810) |
|------------------------|----------------------------------------|-------------------------------------|--------------------------------------|------------------------------------|----------------------------|---------------------------------|------------------------------|
| Incomplete Pregnancies |                                        |                                     |                                      |                                    |                            |                                 |                              |
| 0                      | 10507                                  | 7089                                | 3271                                 | 294                                | 463                        | 1153                            | 626                          |
| 1                      | 3899                                   | 2115                                | 1091                                 | 95                                 | 165                        | 298                             | 130                          |
| 2+                     | 2536                                   | 1266                                | 667                                  | 49                                 | 86                         | 179                             | 54                           |
| Complete Pregnancies   |                                        |                                     |                                      |                                    |                            |                                 |                              |
| 0                      | 2638                                   | 2657                                | 962                                  | 118                                | 200                        | 586                             | 353                          |
| 1                      | 2391                                   | 1577                                | 704                                  | 70                                 | 113                        | 269                             | 131                          |
| 2                      | 5801                                   | 3035                                | 1576                                 | 127                                | 197                        | 418                             | 183                          |
| 3+                     | 6112                                   | 3201                                | 1787                                 | 123                                | 204                        | 357                             | 143                          |

\* The sum of high-grade serous, low-grade serous, mucinous, endometrioid and clear cell is lower than the total number of cases due to some cases not being classified as one of those five histotypes.
